1 Deep time course proteomics of SARS-CoV-  
2 and SARS-CoV-2-infected human lung  
3 epithelial cells (Calu-3) reveals strong  
4 induction of interferon-stimulated gene (ISG)  
5 expression by SARS-CoV-2 in contrast to  
6 SARS-CoV

7 **Authors**

8 *Marica Grossege*<sup>1</sup>, *Daniel Bourquain*<sup>2</sup>, *Markus Neumann*<sup>1</sup>, *Lars Schaade*<sup>2</sup>, *Andreas*  
9 *Nitsche*<sup>1</sup> and *Joerg Doellinger*<sup>1,3\*</sup>

10

11 **Affiliations**

12 <sup>1</sup> Robert Koch Institute, Centre for Biological Threats and Special Pathogens: Highly  
13 Pathogenic Viruses (ZBS 1)

14 <sup>2</sup> Robert Koch Institute, Centre for Biological Threats and Special Pathogens

15 <sup>3</sup> Robert Koch Institute, Centre for Biological Threats and Special Pathogens:  
16 Proteomics and Spectroscopy (ZBS 6)

17

18 \*corresponding author(s): Joerg Doellinger ([Doellingerj@rki.de](mailto:Doellingerj@rki.de)), phone 49-30-18754-  
19 2373

20 **Abstract**

21 SARS-CoV and SARS-CoV-2 infections are characterized by remarkable differences,  
22 including contagiousity and case fatality rate. The underlying mechanisms are not well  
23 understood, illustrating major knowledge gaps of coronavirus biology. In this study,  
24 protein expression of SARS-CoV- and SARS-CoV-2-infected human lung epithelial  
25 cell line Calu-3 was analysed using data-independent acquisition mass spectrometry  
26 (DIA-MS). This resulted in the so far most comprehensive map of infection-related  
27 proteome-wide expression changes in human cells covering the quantification of 7478  
28 proteins across 4 time points. Most notably, the activation of interferon type-I  
29 response was observed, which surprisingly is absent in other recent proteome studies,  
30 but is known to occur in SARS-CoV-2-infected patients. The data reveal that SARS-  
31 CoV-2 triggers interferon-stimulated gene (ISG) expression much stronger than  
32 SARS-CoV, which reflects the already described differences in interferon sensitivity.  
33 Potentially, this may be caused by the enhanced expression of viral M protein of  
34 SARS-CoV in comparison to SARS-CoV-2, which is a known inhibitor of type I  
35 interferon expression. This study expands the knowledge on the host response to  
36 SARS-CoV-2 infections on a global scale using an infection model, which seems to be  
37 well suited to analyse innate immunity.

38

39 **KEYWORDS:** SARS-CoV-2, coronavirus, interferon response, interferon-stimulated  
40 gene (ISG), proteomics, data-independent-acquisition

## 41 **Introduction**

42 In late 2019, first cases of severe pneumonia of unknown origin were reported in  
43 Wuhan, China. Shortly afterwards a new coronavirus was discovered as the causative  
44 agent and named SARS-CoV-2 and the related disease COVID-19. The virus turned  
45 out to be highly contagious and caused a world-wide pandemic, which is still ongoing  
46 and has already led to the death of > 2,900,000 humans worldwide. Already in 2002,  
47 another coronavirus, SARS-CoV, was discovered in China which was related to a  
48 severe acute respiratory syndrome (SARS) and caused an outbreak with about 780  
49 deaths (1). However, at this time the outbreak could be controlled probably due to the  
50 lower contagiousity of SARS-CoV compared to SARS-CoV-2 (2). SARS-CoV and  
51 SARS-CoV-2 share about 80 % of their genome sequence and protein homology  
52 ranges between 40 and 94% (3, 4). Although both viruses mainly lead to respiratory  
53 tract infections and can cause severe pneumonia, they are characterized by remarkable  
54 differences, including contagiousity and case fatality rate (5). As the respiratory tract is  
55 the first and main target of SARS-CoV and SARS-CoV-2 infections, it seems  
56 conclusive to use airway epithelia cells to study differences of these two viruses.  
57 However, no comparative proteomics study has been published using Calu-3 cells  
58 which is the only permissive lung cell line available for SARS-CoV and SARS-CoV-2  
59 (6). Other human lung cells lines, like A549, are only susceptible to SARS-CoV-2  
60 infection upon overexpression of the SARS-CoV receptor ACE2 (6) which was  
61 recently found to be an interferon-stimulated gene (ISG) (7). In the present study, we  
62 used data-independent acquisition mass spectrometry (DIA-MS) to analyse the protein  
63 expression in Calu-3 cells infected with SARS-CoV and SARS-CoV-2 over the time  
64 course of 24 hours. In total, 8391 proteins were identified, 7478 of which could be  
65 reliably quantified across the experiment. This results in a deep and comprehensive  
66 proteome map which reflects time-dependent protein expression changes during

67 SARS-CoV and SARS-CoV-2 infections and provides deep insights into the virus-  
68 specific immunomodulation of human lung cells.

## 69 **Methods**

### 70 **Cell culture and infection**

71 Calu-3 cells (ATCC HTB-55) were cultivated in EMEM containing 10 % FCS, 2 mM  
72 L-Gln and non-essential amino acids. A total of  $5 \times 10^5$  cells per well were seeded in 6-  
73 well plates and incubated overnight at 37°C and 5% CO<sub>2</sub> in a humidified atmosphere.  
74 Medium was removed and cells were infected with SARS-CoV (strain Hong Kong) or  
75 SARS-CoV-2 (hCoV-19/Italy/INM11-isl/2020 (National Institute for Infectious  
76 Diseases, Rome, Italy, GISAID Accession EPI\_ISL\_410545) at an MOI of 5. Mock  
77 samples were treated with medium only. After one hour post infection (p.i.) cells were  
78 washed with PBS and fresh medium was added. After 2, 6, 8, 10 and 24 h p.i. the  
79 medium was removed and stored at -80 °C. Cells were washed with PBS and prepared  
80 for proteomics as described below. For each time point and virus, triplicate samples  
81 were taken. Additionally, triplicate mock samples per time point were taken.

### 82 **Polymerase chain reaction (PCR)**

83 The amount of SARS-CoV and SARS-CoV-2 RNA in the supernatant was analysed  
84 by qPCR at 2, 6, 8, 10 and 24 h p.i.. Supernatants were extracted using the QIAamp  
85 Viral RNA Mini Kit (Qiagen, Hilden, Germany) according to manufacturer's  
86 recommendations and eluted in 60 µL of RNase-free water. Real-time PCR targeting  
87 the viral E gene was carried out as described by Michel et al. (under revision) using  
88 the primers and probe published by Corman et al.(8). Quantification of viral genome  
89 equivalents (GE) was done using the SARS-CoV-2 E gene WHO reference PCR  
90 standard.

91

92

93 **IRF-activity reporter assay**

94 ACE2-A549-Dual™ cells were seeded into 96-well plates at  $4 \times 10^4$  cells per well and  
95 incubated overnight at 37°C and 5% CO<sub>2</sub> in a humidified atmosphere. Cells were  
96 infected with either SARS-CoV or SARS-CoV-2 at an MOI of 1.0. At 2 d p.i.,  
97 interferon regulatory factor (IRF)-activity was assayed using QUANTI-Luc™  
98 luminescence reagent (InvivoGen, San Diego, CA, USA) and an INFINITE 200 PRO  
99 microplate reader (Tecan, Männedorf, Switzerland).

100 **Sample preparation for proteomics.** Samples were prepared for proteomics using  
101 Sample Preparation by Easy Extraction and Digestion (SPEED) (9). At first, medium  
102 was removed and cells were washed using phosphate-buffered saline. Afterwards, 200  
103 µL of trifluoroacetic acid (TFA) (Thermo Fisher Scientific, Waltham, MA, USA)  
104 were added and cells were incubated at room temperature for 3 min. Samples were  
105 neutralized by transferring TFA to prepared reaction tubes containing 1.4 mL of 2M  
106 TrisBase. After adding Tris(2-carboxyethyl)phosphine (TCEP) to a final concentration  
107 of 10 mM and 2-Chloroacetamide (CAA) to a final concentration of 40 mM, samples  
108 were incubated at 95°C for 5 min. 200 µL of the resulting solutions were diluted 1:5  
109 with water and subsequently digested for 20 h at 37°C using 1 µg of Trypsin Gold,  
110 Mass Spectrometry Grade (Promega, Fitchburg, WI, USA). Resulting peptides were  
111 desalted using 200 µL StageTips packed with three Empore™ SPE Disks C18 (3M  
112 Purification Inc., Lexington, USA) and concentrated using a vacuum concentrator (10,  
113 11). Dried peptides were suspended in 20 µL of 0.1 % TFA and quantified by  
114 measuring the absorbance at 280 nm using an Implen NP80 spectrophotometer  
115 (Implen, Munich, Germany).

116 **Liquid chromatography and mass spectrometry.** Peptides were analysed on an  
117 EASY-nanoLC 1200 (Thermo Fisher Scientific, Bremen, Germany) coupled online to  
118 a Q Exactive™ HF mass spectrometer (Thermo Fisher Scientific). 1 µg of peptides

119 were loaded on a  $\mu$ PAC<sup>TM</sup> trapping column (PharmaFluidics, Ghent, Belgium) at a  
120 flow rate of 2  $\mu$ L/min for 6 min and were subsequently separated on a 200 cm  
121  $\mu$ PAC<sup>TM</sup> column (PharmaFluidics) using a stepped 160 min gradient of 80 %  
122 acetonitrile (solvent B) in 0.1 % formic acid (solvent A) at 300 nL/min flow rate: 3–10  
123 % B in 22 min, 10–33 % B in 95 min, 33–49 % B in 23 min, 49–80 % B in 10 min  
124 and 80 % B for 10 min. Column temperature was kept at 50°C using a butterfly heater  
125 (Phoenix S&T, Chester, PA, USA). The Q Exactive<sup>TM</sup> HF was operated in a data-  
126 independent (DIA) manner in the m/z range of 350–1,150. Full scan spectra were  
127 recorded with a resolution of 120,000 using an automatic gain control (AGC) target  
128 value of  $3 \times 10^6$  with a maximum injection time of 100 ms. The Full scans were  
129 followed by 84 DIA scans of dynamic window widths using an overlap of 0.5 Th  
130 (Table.S1). For the correction of predicted peptide spectral libraries, a pooled sample  
131 was measured using gas-phase separation (8 x 100 Th) with 25 x 4 Th windows in  
132 each fraction using a shift of 2 Th for subsequent cycles. Window placement was  
133 optimised using Skyline (Version 4.2.0) (11). DIA spectra were recorded at a  
134 resolution of 30,000 using an AGC target value of  $3 \times 10^6$  with a maximum injection  
135 time of 55 ms and a first fixed mass of 200 Th. Normalized collision energy (NCE)  
136 was set to 25 % and default charge state was set to 3. Peptides were ionized using  
137 electrospray with a stainless steel emitter, I.D. 30  $\mu$ m (Proxeon, Odense, Denmark) at  
138 a spray voltage of 2.0 kV and a heated capillary temperature of 275°C.

139 **Data analysis.** Protein sequences of *Homo sapiens* (UP000005640, 95,915 sequences,  
140 downloaded 23/5/19), SARS-CoV (UP000000354, 15 sequences, downloaded  
141 21/9/20) and SARS-CoV-2 (UP000464024, 14 sequences, downloaded 21/9/20) were  
142 obtained from UniProt (12). A combined spectral library was predicted for all possible  
143 peptides with strict trypsin specificity (KR not P) in the m/z range of 350–1,150 with  
144 charge states of 2–4 and allowing up to one missed cleavage site using ProSist (13).

145 Input files for library prediction were generated using EncyclopeDIA (Version 0.9.5)  
146 (14). The *in-silico* library was corrected using the data of the gas-phase fractionated  
147 pooled sample in DIA-NN (Version 1.7.10) (15). Mass tolerances were set to 10 ppm  
148 for MS1 and 20 ppm for MS<sup>2</sup> spectra, and the “unrelated run” option was enabled with  
149 the false discovery rate being set to 0.01. The single-run data were analysed using the  
150 corrected library with fixed mass tolerances of 10 ppm for MS1 and 20 ppm for MS<sup>2</sup>  
151 spectra with enabled “RT profiling” using the “robust LC (high accuracy)”  
152 quantification strategy. The false discovery rate was set to 0.01 for precursor  
153 identifications and proteins were grouped according to their respective genes. The  
154 resulting identification file was filtered using R (Version 3.6) in order to keep only  
155 proteotypic peptides and proteins with protein q-values < 0.01. Visualization and  
156 further analysis were done in Perseus (Version 1.6.5) (16). Relative protein  
157 quantification was done based on log (2)-transformed and Z-score normalized  
158 “MaxLFQ” intensities. Proteins which were not quantified in at least 2/3rd of all  
159 samples were removed, and remaining missing values were replaced from a normal  
160 distribution (width 0.3, down shift 1.8). Significant protein expression differences  
161 between samples were identified using an ANOVA test with a permutation-based  
162 FDR of 0.05 (250 randomizations, s0 = 1). Afterwards a post-hoc test was applied to  
163 detect significant sample pairs using an FDR of 0.05. Gene ontology enrichment of  
164 differentially expressed proteins was analysed using the ClueGO app (Version 2.5.7)  
165 implemented in Cytoscape (Version 3.8.2) with a Bonferroni-adjusted p-value  
166 threshold of 0.05 (12, 17, 18).

## 167 **Results**

168 Proteome analysis of SARS-CoV- and SARS-CoV-2-infected human lung epithelial  
169 cell line Calu-3 was conducted at 2, 6, 10 and 24 h p.i. including time-matched mock  
170 controls. Samples were prepared as biological triplicates and analysed using single-

171 shot DIA-based proteomics with an optimized workflow for deep and accurate protein  
172 profiling (19). In total, 8391 proteins were identified in a 3 h gradient of which 7478  
173 proteins were consistently quantified and used for further analysis (Pearson correlation  
174 > 0.98, median coefficient of variation between 0.048–0.062 within each triplicate,  
175 data completeness 98.3 %). Viral replication was verified by qPCR of the cell culture  
176 supernatants. The number of viral genome copies started to increase 6 h p.i. and no  
177 difference among SARS-CoV and SARS-CoV-2 was observed at any time point  
178 (**Figure 1**). This is consistent with the expression of viral proteins, which was  
179 detectable from 6 h p.i. as well. The majority of viral proteins including nucleoprotein,  
180 spike glycoprotein, ORF3a, ORF7a and ORF9a are expressed in equal amounts upon  
181 infection with both viruses. The only exception is the membrane protein (M) whose  
182 expression is enhanced in SARS-CoV-infected cells compared to SARS-CoV-2-  
183 infected ones (**Figure 1**).

184 The expression of 2642 human proteins differed significantly between the sample  
185 groups (ANOVA, FDR = 0.05), which was reduced to 261 proteins using a post-hoc  
186 test (FDR = 0.05) when only proteins with at least one significant pairwise difference  
187 in an infected cell with its time-matched mock control were kept. This large reduction  
188 underlines the need for time-matched mock controls in viral proteomics as long  
189 incubation times themselves can already lead to large alterations of the cellular  
190 proteome. The remaining infection-related proteins were grouped using hierarchical  
191 clustering according to their expression profiles, and the respective main clusters were  
192 analysed for enriched gene ontology terms using ClueGO (**Figure 2**). Out of the five  
193 clusters two clusters (up-regulated 2 h p.i. and down-regulated 6 h p.i.) revealed no  
194 significantly enriched GO terms but among others contained several proteins related  
195 to immune response such as OAS1, INAVA and NFKBIB. Another cluster consisting  
196 of proteins with virus-specific time-course-dependent upregulation was found to be



197 related to mitochondrial translation (adjusted p-value:  $2.5 * 10^{-4}$ , MRPL17, MRPL27,  
198 MRPL47, MRPL50 and MRPS7). The other two main clusters included upregulated  
199 proteins 24 h p.i. and are related to either the regulation of complement activation  
200 (adjusted p-value:  $7.9 * 10^{-3}$ , C3 and C5) or interferon alpha/beta signalling (adjusted  
201 p-value:  $7.8 * 10^{-20}$ , e.g. MX1, MX2, DDX58, STAT1, OAS2, OAS3 and IFIT3).  
202 Strikingly, the main difference between SARS-CoV- and SARS-CoV-2-infected cells  
203 was observed for proteins derived from interferon-stimulated genes (ISG), whose  
204 expression is enhanced in SARS-CoV-2-infected cells in comparison to SARS-CoV  
205 infection. This was confirmed by higher IFN induction triggered by SARS-CoV-2 in  
206 ACE2-A549 reporter cells compared to no detectable IFN-regulatory factor activity  
207 upon infection with SARS-CoV (**SI Figure 1**). As the type I interferon response is the  
208 most important one of the innate immune system to RNA viruses, we compared the  
209 expression data of related proteins from this study with other major proteome studies  
210 of SARS-CoV-2-infected human cells. For this purpose, all identified proteins  
211 annotated with the GO term “type I interferon signalling pathway” (GO:0060337)  
212 were extracted from the data of Stukalov et al. (<https://covinet.innatelab.org>, A549-  
213 ACE2 cells, MOI = 2) and Bojkova et al. (Caco-2 cells, MOI = 1), matched and  
214 clustered according to their expression profiles (**Figure 3**) (20, 21). The resulting  
215 heatmap revealed that the activation of the type I interferon response is completely  
216 absent in the other studies. However, it has to be noted that the coverage of this  
217 pathway differs strongly among the studies. Most of the ISGs with expression changes  
218 induced by infection are exclusively detected in the present study, which reflects the  
219 fact that the total number of quantified proteins was the largest among the studies as  
220 well. Furthermore, an interaction network of all infection-related proteins from this  
221 study was constructed using STRING ((22), <https://string-db.org/>) (**Figure 4**). The  
222 network revealed high connectivity among proteins related to either innate immunity

223 (mainly interferon type I signalling), exocytosis, including proteins related to platelet  
224 degranulation (adjusted p-value: 0.01, e.g. FGB, FGG, FN1, PLG and PSAP) or  
225 mitochondria-associated proteins including many members of the ribonucleoprotein  
226 complex related to mtDNA expression.

## 227 **Discussion**

228 Innate immunity is the host's first line of defence to fight infections. The most  
229 important mechanism to combat replication of RNA viruses is the interferon response.  
230 It is based on the recognition of pathogen-associated molecular patterns (PAMP),  
231 especially double-stranded RNA (dsRNA), which in the end results in the secretion of  
232 type-I interferons which in turn induce the expression of interferon-stimulated genes  
233 (ISG) including multiple antiviral proteins (23). Recently, it was shown that SARS-  
234 CoV-2 is more sensitive to both IFN- $\alpha$  and IFN- $\beta$  treatment in cultured cells than  
235 SARS-CoV (24-27), which could favour a positive outcome of several clinical trials  
236 evaluating type-I IFNs as a possible treatment for COVID-19 (28). Clinical data from  
237 SARS-CoV-2-infected patients report low or absent levels of IFN-I in serum but  
238 induction of ISG expression (3, 29). It was further demonstrated that SARS-CoV-2  
239 induces types I, II or III interferons in infected human lung tissues in contrast to  
240 SARS-CoV (30). However, the mechanism behind the varying IFN sensitivity of  
241 closely-related SARS-CoV and SARS-CoV-2 is elusive. In general, proteomics  
242 should be well suited to uncover the modulation of the type-I interferon response by  
243 SARS coronaviruses.

244 The experiments in the present study resulted in the so far most comprehensive map of  
245 infection-related proteome expression changes in SARS-CoV- and SARS-CoV-2-  
246 infected cells covering ~ 7400 proteins across 4 time points. Expression of 261  
247 proteins changed during the course of infection, which cluster into 5 main groups. One  
248 of those clusters reveals a strong induction of ISG expression 24 h p.i. in SARS-CoV-

249 2-infected cells. Strikingly, this induction was observed at a much lower level in  
250 SARS-CoV-infected cells, which could reflect the varying IFN sensitivity. Among  
251 those ISG proteins is e.g. Mx1 which is known for its antiviral activity against a wide  
252 range of viruses. It was shown before that Mx1 expression is increased in SARS-CoV-  
253 2-infected patients and correlates well with viral load (31). Furthermore, it was  
254 demonstrated that ISG expression is induced in SARS-CoV-2-infected patients in  
255 general and that the increase of ISG expression, including Mx1, has a negative  
256 correlation with disease severity (29). Surprisingly, these findings are not reflected in  
257 the current literature of large-scale proteome analysis of infected human cells (20, 21).  
258 The absence of an enhanced ISGs expression in other proteome studies can result  
259 from incomplete proteome coverage or from different experimental conditions, e.g.  
260 different cell lines and MOIs. It was shown before that ISGs and IFN can be detected  
261 upon infection of A549-ACE2 and Calu-3 cells with SARS-CoV-2 and that higher  
262 MOIs favour interferon induction (32, 33). However, this was surprisingly not  
263 detected in the study of Stukalov et al. To shed light on this discrepancy, we  
264 performed a meta-analysis of type-I interferon related proteins by comparing data  
265 from this study to the studies of Bojkova et al. and Stukalov et al. (20, 21).  
266 Interestingly, most of the strongly affected ISGs, including Mx1, Mx2, IFIT1, IFIT2,  
267 IFIT3, OASL and OASL2, were not identified in the previous studies. The low  
268 coverage of this pathway could explain at least partially the discrepancy. It must also  
269 be noted that the influence of ACE2 overexpression, which was used by Stukalov et  
270 al. to turn A549 into a permissive cell line, on the immune response is unknown, and  
271 recently it has been shown that ACE2 is an ISG itself (7). This meta-analysis  
272 demonstrates that proteome coverage is still a limitation which impedes intra-study  
273 cross-comparisons due to missing values.

274 Recently, it was proposed that SARS-CoV-2 ORF6 interferes less efficiently with  
275 human interferon induction and interferon signalling than SARS-CoV ORF6, which  
276 could explain the virus-specific induction of ISG expression and the varying  
277 interferon sensitivity (34). The proteome data from this study point towards an  
278 additional mechanism. The expression of viral proteins was highly similar between  
279 SARS-CoV and SARS-CoV-2 except for the M protein whose expression is enhanced  
280 in SARS-CoV. This protein is a component of the viral envelope but its functions  
281 beyond are not well characterized. It is known that the homologous M proteins of  
282 MERS and SARS-CoV inhibit type I interferon expression (35, 36). Recently, it was  
283 discovered that overexpression of the M protein from SARS-CoV-2 in human cells  
284 inhibits the production of type I and III IFNs induced by dsRNA-sensing via direct  
285 interaction with RIG-I (DDX58) and reduces the induction of ISGs after Sendai virus  
286 (SEV) infection and poly (I:C) transfection (33, 37). Additionally, it was shown that  
287 the M protein of SARS-CoV inhibits the formation of TRAF3·TANK·TBK1/IKK $\epsilon$   
288 complex, resulting in the inhibition of IFN transcription (35). We therefore  
289 hypothesize that the enhanced expression of the M protein of SARS-CoV reduces the  
290 induction of ISG expression in infected cells in comparison to SARS-CoV-2 and so  
291 contributes to the varying IFN sensitivity of both viruses. The gene expression of  
292 coronaviruses is controlled both on transcriptional and translational level (38). When  
293 comparing the core regulating elements of the M gene of SARS-CoV and SARS-CoV-  
294 2, it can be noted that both viruses have identical transcription regulatory sequences  
295 but quite diverse sequences around the translation initiation site, leading to the  
296 hypothesis of a different translational regulation (39). However, it should be noted that  
297 also sequence differences in the M protein of both viruses could lead to differences in  
298 the interferon-antagonizing capacity which is not known so far (**SI Figure 2**).

299 Summarized this study presents the so far most comprehensive comparative  
300 quantitative proteomics data set of SARS-CoV- and SARS-CoV-2-infected Calu-3  
301 cells which are the only permissive human lung cell line for SARS-CoV-2 (6). By  
302 showing a diverse regulation of ISG expression upon infection, we conclude that  
303 Calu-3 cells present a good model system for studying differences in IFN sensitivity  
304 of SARS-CoV and SARS-CoV-2.

305

306

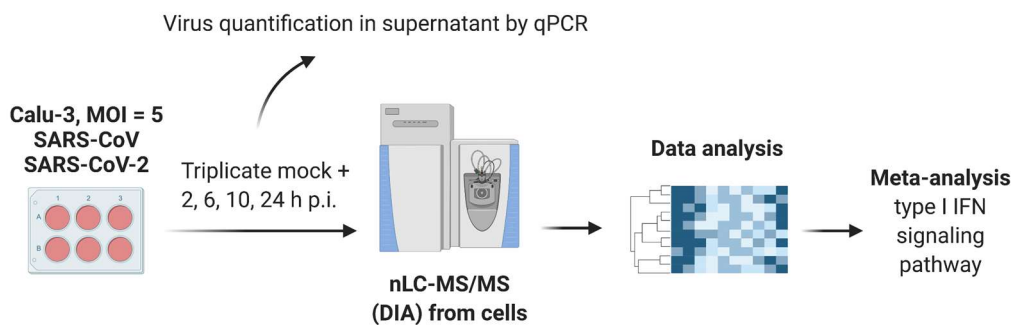

307

308 Graphical Abstract

309

310

311 A

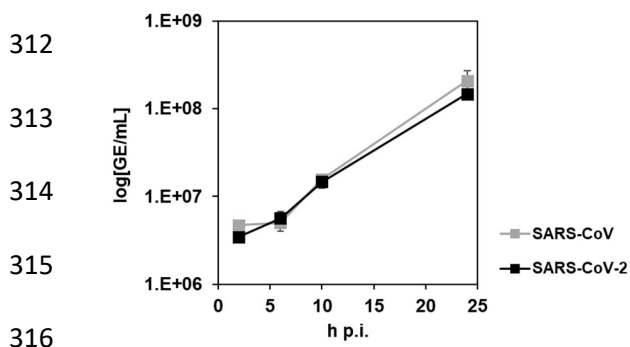

317 B

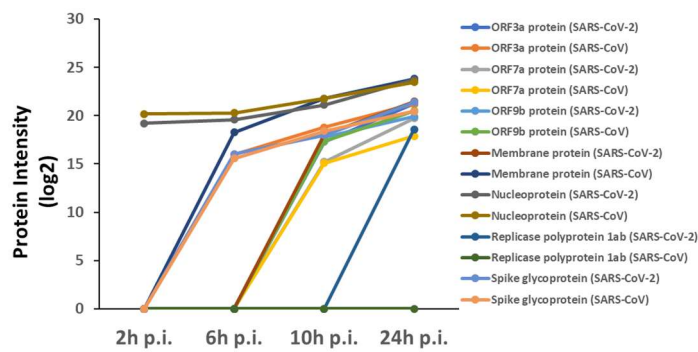

320 C

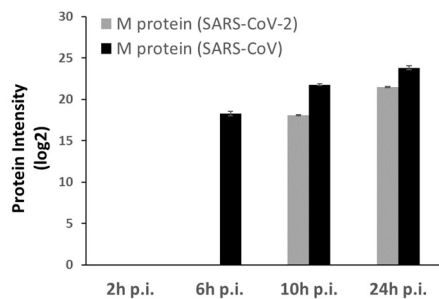

Figure 1. Viral protein expression and quantification of virus in the supernatant.

Calu-3 cells were infected with SARS-CoV, SARS-CoV-2 or mock infected. After 2, 6, 10 and 24 h post infection (p.i.) the virus was quantified in the supernatant by qPCR (A). Protein expression in infected cells was analysed by data-independent acquisition (DIA) mass spectrometry. Intensities of viral proteins in infected Calu-3 cells are shown in (B). Expression of viral M protein is shown in (C).

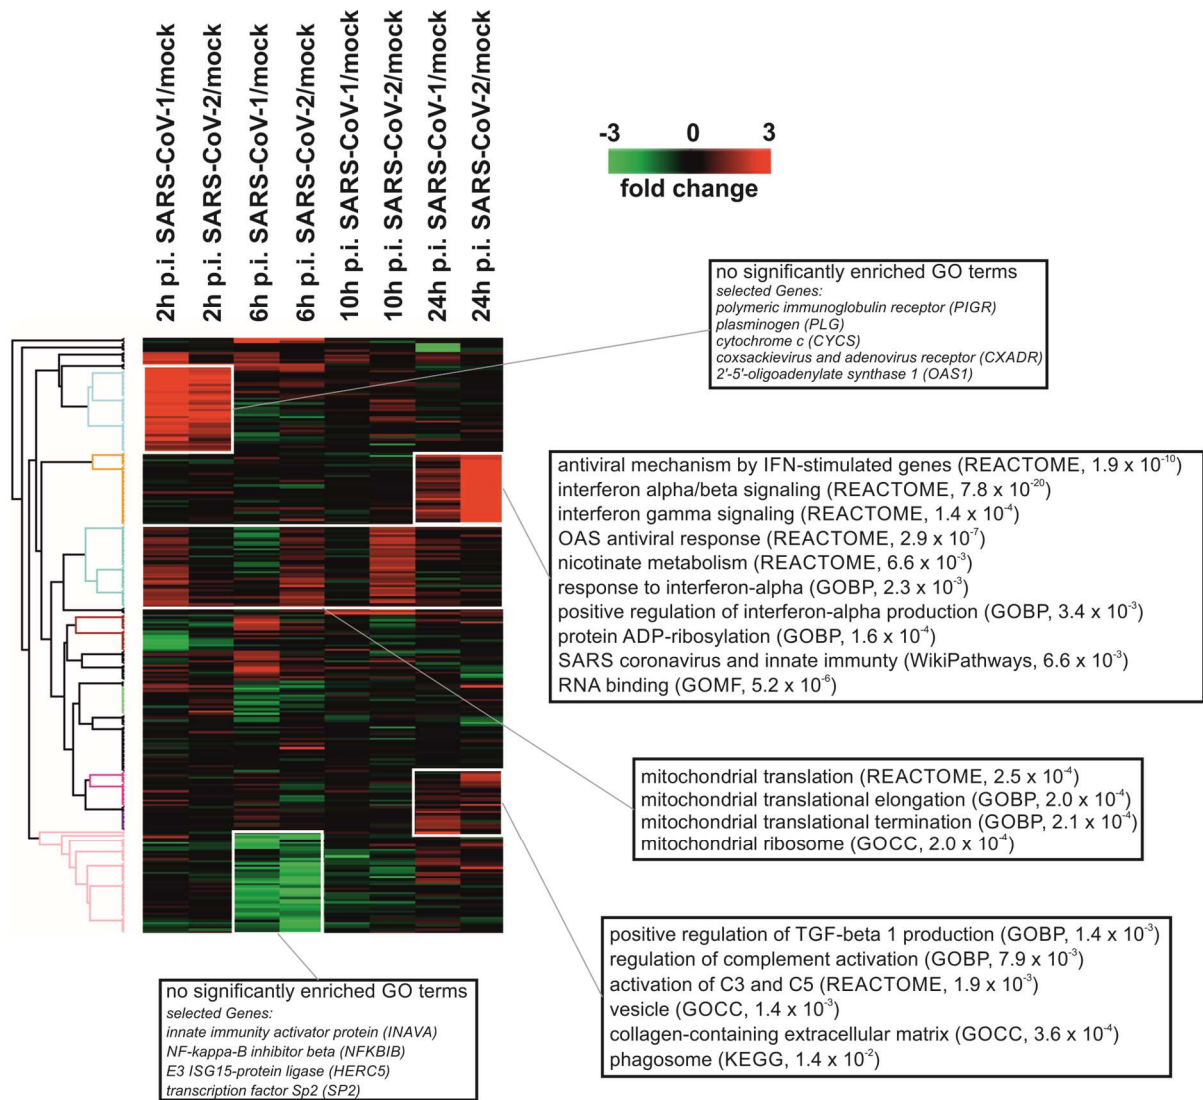

329

330

331 Figure 2. Infection-related alterations in the host proteome.

332 Infection of Calu-3 cells with SARS-CoV and SARS-CoV-2 altered the abundance of

333 261 human proteins in comparison to time-matched mock controls. The heatmap

334 depicts those proteins represented by their log<sub>2</sub>-transformed intensities using

335 hierarchical clustering. Selected GO terms resulting from an enrichment analysis

336 using ClueGO are denoted for the five main clusters. Complete results of the GO

337 analysis can be found in the supplementary information.



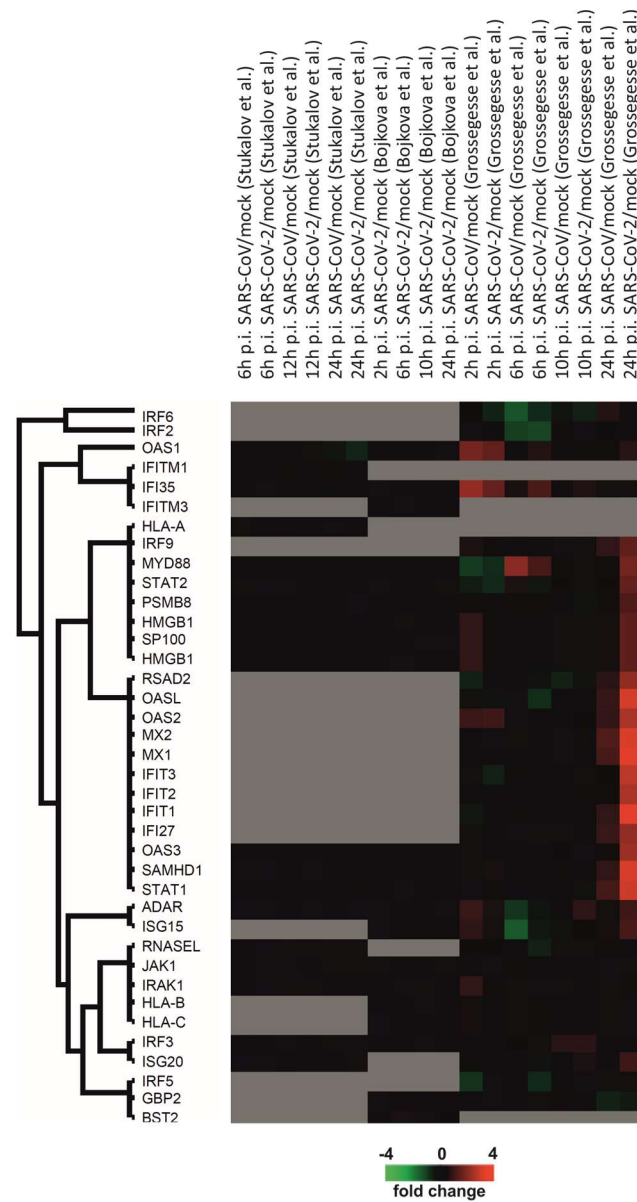

338

339 Figure 3. Meta-analysis of proteins associated with type I IFN signalling pathway.

340 Expression data of all identified proteins associated with type I interferon signalling

341 pathway (GO:0060337) were extracted from proteome studies of SARS-CoV-2-

342 infected human cell lines done by Stukalov et al., Bojkova et al. and Grossegesse et al.

343 and summarized in a heatmap representing log<sub>2</sub>-transformed intensity values. Missing

344 values are grey.

345

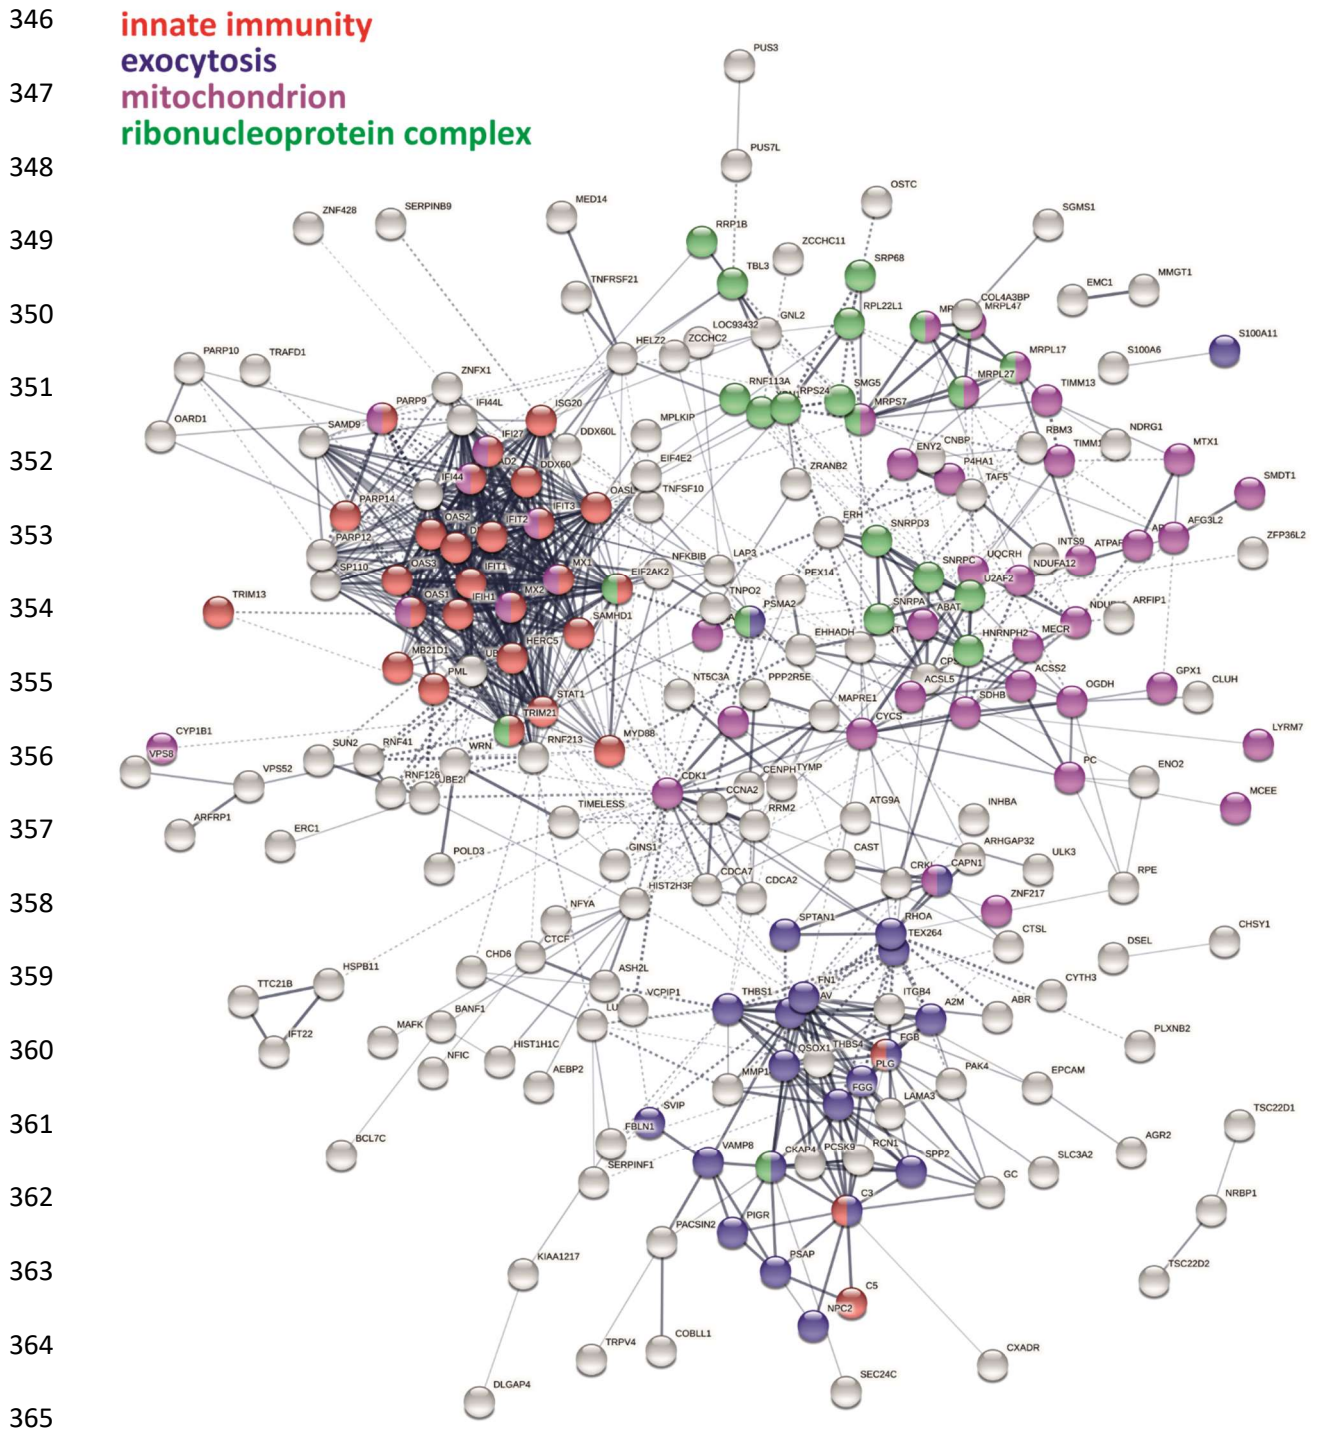

366 Figure 4. Protein interaction network of infection-related human proteins.  
367 The interaction network of all human proteins (N = 261) in Calu-3 cells affected by  
368 SARS-CoV and SARS-CoV-2 infections was constructed using StringDB.  
369

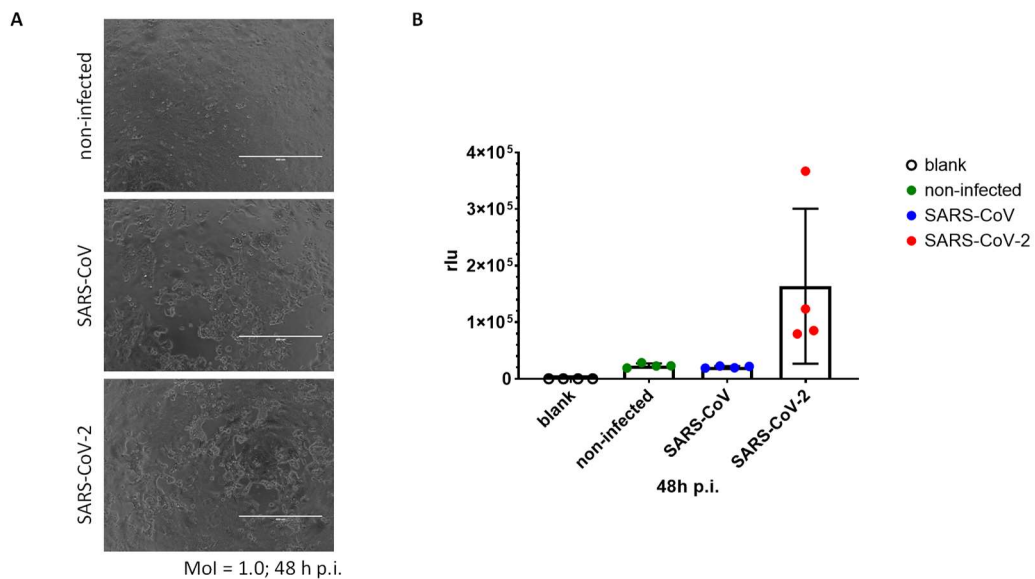

370

371 SI Figure 1. (A) Cytopathic effect and (B) IRF activity 48 h post SARS-CoV and

372 SARS-CoV-2 infection of A549-Dual-ACE2 cells (MOI = 1.0).

373

374

375

376

377

378

379

380

381

382

383

384

385

386

387

388

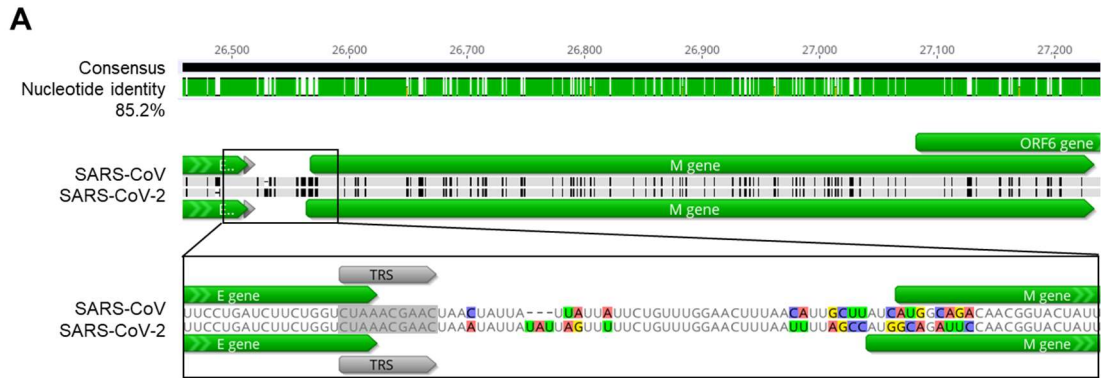

394

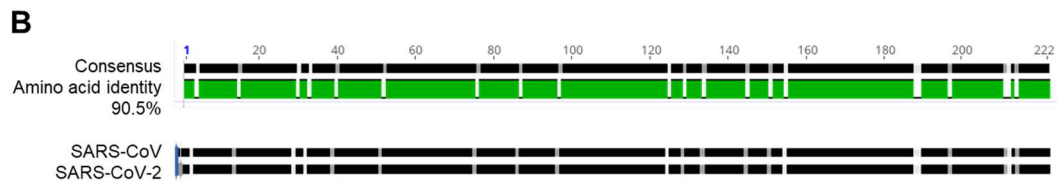

397

398 SI Figure 2: Sequence comparison of regulatory elements of the M protein of SARS-  
 399 CoV and SARS-CoV-2. (A) Comparison of nucleotide sequences. TRS: transcription  
 400 regulatory sequence according to Wu et al. Sequences were derived from NCBI:  
 401 NC\_004718 (SARS-CoV) and NC\_045512 (SARS-CoV-2). (B) Comparison of amino  
 402 acid sequences. Sequences were derived from UniProt: sp|P59596|VME1\_SARS  
 403 (SARS-CoV) and sp|P0DTC5|VME1\_SARS2 (SARS-CoV-2).

404

405

406

407

408

409

410

## 411 **Acknowledgements**

412 The authors would like to thank Clemens Bodenstein, Bianca Hube, Melanie  
413 Hoffmeister and Stefanie Schürer for supporting the infection experiments and qPCR  
414 and Ursula Erikli for copy-editing.

## 415 *Access to proteomics data*

416 The mass spectrometry proteomics data have been deposited to the ProteomeXchange  
417 Consortium (<http://proteomecentral.proteomexchange.org>) via the PRIDE partner  
418 repository with the dataset identifiers PXD024883.

419

## 420 **References**

421

- 422 1. Hui DS, Azhar EI, Madani TA, Ntoumi F, Kock R, Dar O, et al. The continuing  
423 2019-nCoV epidemic threat of novel coronaviruses to global health - The latest 2019  
424 novel coronavirus outbreak in Wuhan, China. *Int J Infect Dis.* 2020;91:264-6.
- 425 2. Petersen E, Koopmans M, Go U, Hamer DH, Petrosillo N, Castelli F, et al.  
426 Comparing SARS-CoV-2 with SARS-CoV and influenza pandemics. *Lancet Infect Dis.*  
427 2020;20(9):e238-e44.
- 428 3. Chan JF, Kok KH, Zhu Z, Chu H, To KK, Yuan S, et al. Genomic  
429 characterization of the 2019 novel human-pathogenic coronavirus isolated from a  
430 patient with atypical pneumonia after visiting Wuhan. *Emerg Microbes Infect.*  
431 2020;9(1):221-36.
- 432 4. Grifoni A, Sidney J, Zhang Y, Scheuermann RH, Peters B, Sette A. A Sequence  
433 Homology and Bioinformatic Approach Can Predict Candidate Targets for Immune  
434 Responses to SARS-CoV-2. *Cell Host Microbe.* 2020;27(4):671-80 e2.

- 435 5. Rossi GA, Sacco O, Mancino E, Cristiani L, Midulla F. Differences and  
436 similarities between SARS-CoV and SARS-CoV-2: spike receptor-binding domain  
437 recognition and host cell infection with support of cellular serine proteases. *Infection*.  
438 2020;48(5):665-9.
- 439 6. Cagno V. SARS-CoV-2 cellular tropism. *Lancet Microbe*. 2020;1(1):e2-e3.
- 440 7. Ziegler CGK, Allon SJ, Nyquist SK, Mbanjo IM, Miao VN, Tzouanas CN, et al.  
441 SARS-CoV-2 Receptor ACE2 Is an Interferon-Stimulated Gene in Human Airway  
442 Epithelial Cells and Is Detected in Specific Cell Subsets across Tissues. *Cell*.  
443 2020;181(5):1016-35 e19.
- 444 8. Corman VM, Landt O, Kaiser M, Molenkamp R, Meijer A, Chu DK, et al.  
445 Detection of 2019 novel coronavirus (2019-nCoV) by real-time RT-PCR. *Euro Surveill*.  
446 2020;25(3):2000045.
- 447 9. Doellinger J, Schneider A, Hoeller M, Lasch P. Sample Preparation by Easy  
448 Extraction and Digestion (SPEED) - A Universal, Rapid, and Detergent-free Protocol  
449 for Proteomics Based on Acid Extraction. *Mol Cell Proteomics*. 2020;19(1):209-22.
- 450 10. Rappsilber J, Mann M, Ishihama Y. Protocol for micro-purification, enrichment,  
451 pre-fractionation and storage of peptides for proteomics using StageTips. *Nat Protoc*.  
452 2007;2(8):1896-906.
- 453 11. Pino LK, Searle BC, Bollinger JG, Nunn B, MacLean B, MacCoss MJ. The  
454 Skyline ecosystem: Informatics for quantitative mass spectrometry proteomics. *Mass*  
455 *Spectrom Rev*. 2020;39(3):229-44.
- 456 12. UniProt Consortium. UniProt: a worldwide hub of protein knowledge. *Nucleic*  
457 *Acids Res*. 2019;47(D1):D506-D15.
- 458 13. Gessulat S, Schmidt T, Zolg DP, Samaras P, Schnatbaum K, Zerweck J, et al.  
459 Prosit: proteome-wide prediction of peptide tandem mass spectra by deep learning. *Nat*  
460 *Methods*. 2019;16(6):509-18.

- 461 14. Searle BC, Pino LK, Egertson JD, Ting YS, Lawrence RT, MacLean BX, et al.  
462 Chromatogram libraries improve peptide detection and quantification by data  
463 independent acquisition mass spectrometry. *Nat Commun.* 2018;9(1):5128.
- 464 15. Demichev V, Messner CB, Vernardis SI, Lilley KS, Ralser M. DIA-NN: neural  
465 networks and interference correction enable deep proteome coverage in high  
466 throughput. *Nat Methods.* 2020;17(1):41-4.
- 467 16. Tyanova S, Temu T, Sinitcyn P, Carlson A, Hein MY, Geiger T, et al. The  
468 Perseus computational platform for comprehensive analysis of (prote)omics data. *Nat*  
469 *Methods.* 2016;13(9):731-40.
- 470 17. Bindea G, Mlecnik B, Hackl H, Charoentong P, Tosolini M, Kirilovsky A, et al.  
471 ClueGO: a Cytoscape plug-in to decipher functionally grouped gene ontology and  
472 pathway annotation networks. *Bioinformatics.* 2009;25(8):1091-3.
- 473 18. Shannon P, Markiel A, Ozier O, Baliga NS, Wang JT, Ramage D, et al.  
474 Cytoscape: a software environment for integrated models of biomolecular interaction  
475 networks. *Genome Res.* 2003;13(11):2498-504.
- 476 19. Doellinger J, Blumenschein C, Schneider A, Lasch P. Isolation Window  
477 Optimization of Data-Independent Acquisition Using Predicted Libraries for Deep and  
478 Accurate Proteome Profiling. *Anal Chem.* 2020;92(18):12185-92.
- 479 20. Stukalov A, Girault V, Grass V, Karayel O, Bergant V, Urban C, et al.  
480 Multilevel proteomics reveals host perturbations by SARS-CoV-2 and SARS-CoV.  
481 *Nature.* 2021.
- 482 21. Bojkova D, Klann K, Koch B, Widera M, Krause D, Ciesek S, et al. Proteomics  
483 of SARS-CoV-2-infected host cells reveals therapy targets. *Nature.*  
484 2020;583(7816):469-72.

- 485 22. Jensen LJ, Kuhn M, Stark M, Chaffron S, Creevey C, Muller J, et al. STRING  
486 8--a global view on proteins and their functional interactions in 630 organisms. *Nucleic*  
487 *Acids Res.* 2009;37(Database issue):D412-6.
- 488 23. Mesev EV, LeDesma RA, Ploss A. Decoding type I and III interferon signalling  
489 during viral infection. *Nat Microbiol.* 2019;4(6):914-24.
- 490 24. Lokugamage KG, Hage A, de Vries M, Valero-Jimenez AM, Schindewolf C,  
491 Dittmann M, et al. Type I Interferon Susceptibility Distinguishes SARS-CoV-2 from  
492 SARS-CoV. *J Virol.* 2020;94(23):e01410-20.
- 493 25. Mantlo E, Bukreyeva N, Maruyama J, Paessler S, Huang C. Antiviral activities  
494 of type I interferons to SARS-CoV-2 infection. *Antiviral Res.* 2020;179:104811.
- 495 26. Shuai H, Chu H, Hou Y, Yang D, Wang Y, Hu B, et al. Differential immune  
496 activation profile of SARS-CoV-2 and SARS-CoV infection in human lung and  
497 intestinal cells: Implications for treatment with IFN-beta and IFN inducer. *J Infect.*  
498 2020;81(4):e1-e10.
- 499 27. Felgenhauer U, Schoen A, Gad HH, Hartmann R, Schaubmar AR, Failing K, et  
500 al. Inhibition of SARS-CoV-2 by type I and type III interferons. *J Biol Chem.*  
501 2020;295(41):13958-64.
- 502 28. Sa Ribero M, Jouvenet N, Dreux M, Nisole S. Interplay between SARS-CoV-2  
503 and the type I interferon response. *PLoS Pathog.* 2020;16(7):e1008737.
- 504 29. Hadjadj J, Yatim N, Barnabei L, Corneau A, Boussier J, Smith N, et al. Impaired  
505 type I interferon activity and inflammatory responses in severe COVID-19 patients.  
506 *Science.* 2020;369(6504):718-24.
- 507 30. Chu H, Chan JF, Wang Y, Yuen TT, Chai Y, Hou Y, et al. Comparative  
508 Replication and Immune Activation Profiles of SARS-CoV-2 and SARS-CoV in  
509 Human Lungs: An Ex Vivo Study With Implications for the Pathogenesis of COVID-  
510 19. *Clin Infect Dis.* 2020;71(6):1400-9.



- 511 31. Bizzotto J, Sanchis P, Abbate M, Lage-Vickers S, Lavignolle R, Toro A, et al.  
512 SARS-CoV-2 Infection Boosts MX1 Antiviral Effector in COVID-19 Patients.  
513 *iScience*. 2020;23(10):101585.
- 514 32. Blanco-Melo D, Nilsson-Payant BE, Liu WC, Uhl S, Hoagland D, Moller R, et  
515 al. Imbalanced Host Response to SARS-CoV-2 Drives Development of COVID-19.  
516 *Cell*. 2020;181(5):1036-45 e9.
- 517 33. Lei X, Dong X, Ma R, Wang W, Xiao X, Tian Z, et al. Activation and evasion  
518 of type I interferon responses by SARS-CoV-2. *Nat Commun*. 2020;11(1):3810.
- 519 34. Schroeder, S; Pott, F; Niemeyer, D; Veith, T; Richter, A; Muth, D; et al.  
520 Interferon antagonism by SARS-CoV-2: a functional study using reverse genetics. *The*  
521 *Lancet Microbe*. 2021.
- 522 35. Siu KL, Kok KH, Ng MH, Poon VK, Yuen KY, Zheng BJ, et al. Severe acute  
523 respiratory syndrome coronavirus M protein inhibits type I interferon production by  
524 impeding the formation of TRAF3.TANK.TBK1/IKKepsilon complex. *J Biol Chem*.  
525 2009;284(24):16202-9.
- 526 36. Lui PY, Wong LY, Fung CL, Siu KL, Yeung ML, Yuen KS, et al. Middle East  
527 respiratory syndrome coronavirus M protein suppresses type I interferon expression  
528 through the inhibition of TBK1-dependent phosphorylation of IRF3. *Emerg Microbes*  
529 *Infect*. 2016;5(4):e39.
- 530 37. Zheng Y, Zhuang MW, Han L, Zhang J, Nan ML, Zhan P, et al. Severe acute  
531 respiratory syndrome coronavirus 2 (SARS-CoV-2) membrane (M) protein inhibits  
532 type I and III interferon production by targeting RIG-I/MDA-5 signaling. *Signal*  
533 *Transduct Target Ther*. 2020;5(1):299.
- 534 38. Alonso S, Izeta A, Sola I, Enjuanes L. Transcription regulatory sequences and  
535 mRNA expression levels in the coronavirus transmissible gastroenteritis virus. *J Virol*.  
536 2002;76(3):1293-308.

- 537 39. Wu F, Zhao S, Yu B, Chen YM, Wang W, Song ZG, et al. A new coronavirus  
538 associated with human respiratory disease in China. *Nature*. 2020;579(7798):265-9.  
539
